# Supplementary material for: Mutual interactions between α-amylase and amyloglucosidase in the digestion of starch with distinct chain-length distributions at a fully gelatinized state
Source: Royal Society of Chemistry journal article supplement (doi:10.1039/d1fo04256d), 2022-01-01
Supplement: d1fo04256d1.pdf [file d1fo04256d1.pdf]

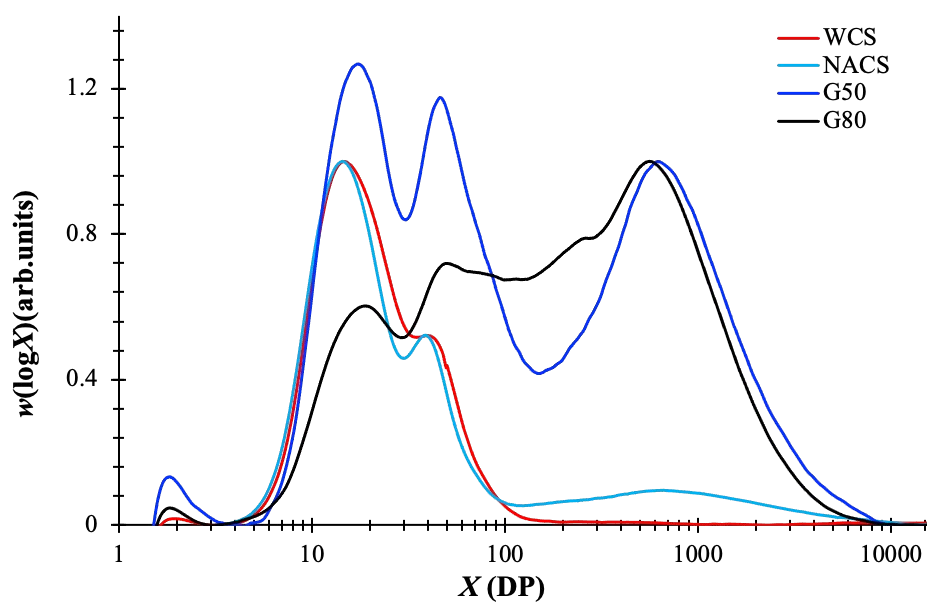

**Figure. S1** The SEC weight distributions  $w(\log X)$  of debranched native starches as a function of the degree of polymerization (DP). Data was based on duplicate measurements.

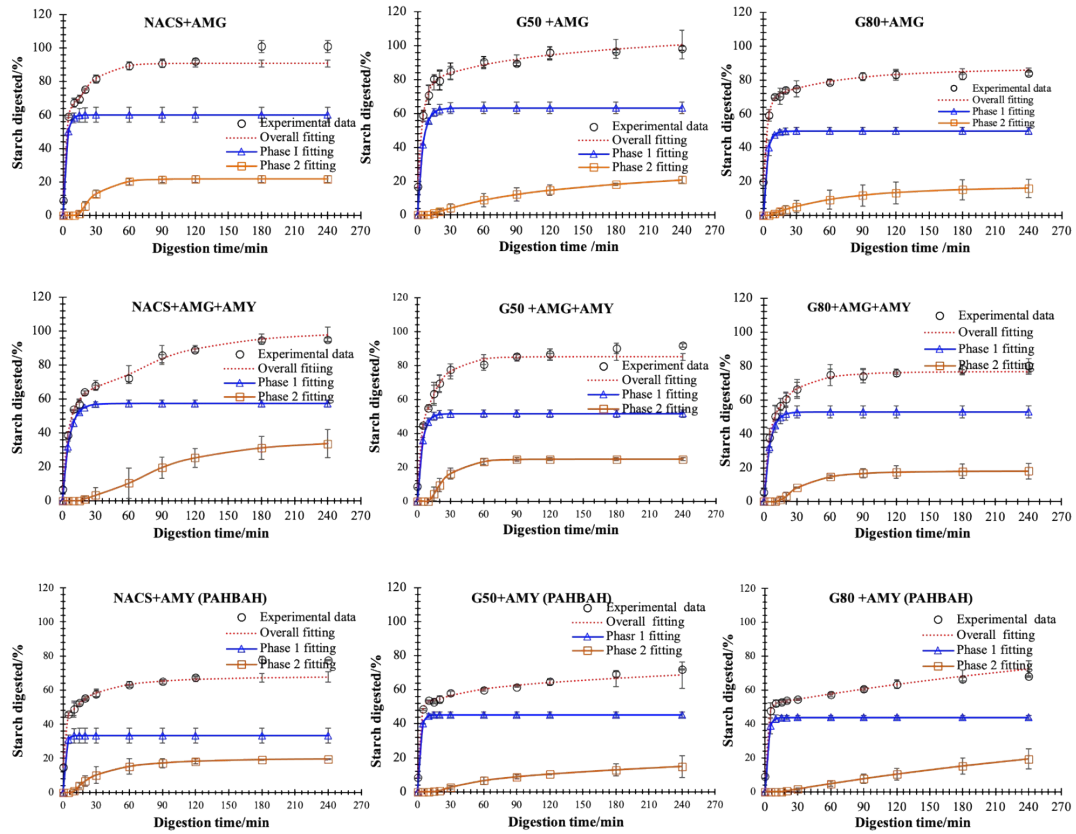

**Figure. S2 Fitting results of the digestograms by the combination of parallel and sequential (CPS) kinetics model of NACS, G50 and G80.**
